# Supplementary material for: Influence of Chemically Disrupted Photosynthesis on Cyanobacterial Thylakoid Dynamics in Synechocystis sp. PCC 6803
Source: PubMed Central journal article supplement (PMC6450941; doi:10.1038/s41598-019-42024-0), 2019-04-05
Supplement: 41598_2019_42024_MOESM1_ESM.pdf [file 41598_2019_42024_MOESM1_ESM.pdf]

## Supplementary Information

# Influence of Chemically Disrupted Photosynthesis on Cyanobacterial Thylakoid Dynamics in *Synechocystis* sp. PCC 6803

**Authors:** Laura-Roxana Stingaciu<sup>1,2\*</sup>, Hugh M. O'Neill<sup>1</sup>, Michelle Liberton<sup>3</sup>, Himadri B. Pakrasi<sup>3</sup>, Volker S. Urban<sup>1</sup>

### **Affiliations:**

<sup>1</sup>NScD, Oak Ridge National Laboratory, Oak Ridge, TN 37831, USA.

<sup>2</sup>JCNS1, FZJ outstation at SNS, Oak Ridge National Laboratory, Oak Ridge, TN 37831, USA.

<sup>3</sup>Department of Biology, Washington University, St. Louis, MO 63130, USA.

\*Correspondence to: [stingaciulr@ornl.gov](mailto:stingaciulr@ornl.gov)

| Sample                      | q<br>(Å <sup>-1</sup> ) | Γ<br>(1/ns) | Γ<br>err | χ <sup>2</sup> | Γ/q <sup>3</sup><br>(Å <sup>3</sup> /ns) | Γ/q <sup>3</sup><br>err | t<br>(ns) | t<br>err | κ̃<br>(k <sub>B</sub> T) ** | κ̃<br>err |
|-----------------------------|-------------------------|-------------|----------|----------------|------------------------------------------|-------------------------|-----------|----------|-----------------------------|-----------|
| WT dark                     | 0.037                   | 2.58E-4     | 0.38E-4  | 0.91           | 5.02                                     | 0.85                    | 3880.5    | 564.8    | -                           | -         |
| WT dark                     | 0.056                   | 10.3E-4     | 0.83E-4  | 0.42           | 5.79                                     | 0.68                    | 969.9     | 78.2     | -                           | -         |
| WT dark                     | 0.103                   | 14.5E-4     | 0.96E-4  | 0.44           | 1.29                                     | 0.29                    | 688.2     | 45.4     | -                           | -         |
| WT dark at y intercept      | -                       | -           | -        | -              | 1.08                                     | 0.14                    | -         | -        | 5654.85                     | 1420.5    |
| WT-DCMU dark                | 0.037                   | 2.68E-4     | 0.36E-4  | 0.92           | 5.07                                     | 0.82                    | 3729.9    | 491.7    | -                           | -         |
| WT-DCMU dark                | 0.056                   | 4.26E-4     | 0.28E-4  | 1.15           | 2.46                                     | 0.41                    | 2349.6    | 156.9    | -                           | -         |
| WT-DCMU dark                | 0.103                   | 9.83E-4     | 0.91E-4  | 0.65           | 0.89                                     | 0.29                    | 1016.6    | 94.3     | -                           | -         |
| WT-DCMU dark at y intercept | -                       | -           | -        | -              | 0.87                                     | 0.06                    | -         | -        | 8712.69                     | 1283.8    |

**Table S1. Relaxation and bending properties with statistical errors ( $1\sigma$ ) of native WT and inhibited WT-DCMU membranes during the dark cycle.** The relaxation parameters are calculated according to equation (1) with  $\chi^2$  the goodness of  $\Gamma$  fit. The effective bending coefficient is calculated according to equation (3) from the y intercept of the Lorentz fit in Fig. 2a. **\*\*The value 0.00125 kg (m s)<sup>-1</sup> is used as the D<sub>2</sub>O viscosity at 20°C in calculation of the bending modulus.**

| Sample        | $\Gamma_{zG}/q^3$<br>( $\text{\AA}^3/\text{ns}$ ) | $\Gamma_{zG}/q^3$<br>err | $q_0$<br>( $\text{\AA}^{-1}$ ) | $q_0$<br>err | A<br>( $\text{\AA}^3/\text{ns}$ ) | A<br>err | $\xi$<br>( $\text{\AA}$ ) | $\xi$<br>err | $A \cdot q_0^3$<br>( $\text{ns}^{-1}$ ) | $A \cdot q_0^3$<br>err | $\chi^2$ |
|---------------|---------------------------------------------------|--------------------------|--------------------------------|--------------|-----------------------------------|----------|---------------------------|--------------|-----------------------------------------|------------------------|----------|
| WT dark       | 1.08                                              | 0.14                     | 0.0460                         | 0.0005       | 13.70                             | 1.2      | 130.8                     | 14           | 13.4E-4                                 | 1.63E-4                | 1.09     |
| WT-DCMU dark  | 0.87                                              | 0.06                     | 0.0441                         | 0.0002       | 7.74                              | 0.3      | 153.8                     | 7.8          | 6.65E-4                                 | 0.35E-4                | 0.19     |
| WT light      | 0.73                                              | 0.08                     | 0.0470                         | 0.0006       | 3.91                              | 0.2      | 69.9                      | 7.8          | 4.07E-4                                 | 0.37E-4                | 0.15     |
| WT-DCMU light | 1.00                                              | 0.07                     | 0.0398                         | 0.0007       | 5.29                              | 0.2      | 109.3                     | 10.4         | 3.34E-4                                 | 0.32E-4                | 0.22     |

**Table S2. Membranes shape fluctuation characteristics with statistical errors ( $1\sigma$ ).** The parameters represent the Lorentz fit results of the  $q^3$ -normalized relaxation rate  $\Gamma$  using equation (2), with  $\chi^2$  the goodness of fit. A characterizes the damping frequency of the peristaltic mode,  $\xi$  is the peristaltic mode amplitude,  $q_0$  is the local length scale to observe thickness and shape fluctuations, and the product  $A \cdot q_0^3$  describes the decay rate of the local fluctuations.

| Sample                       | q<br>(Å <sup>-1</sup> ) | Γ<br>(1/ns) | Γ<br>err | χ <sup>2</sup> | Γ/q <sup>3</sup><br>(Å <sup>3</sup> /ns) | Γ/q <sup>3</sup><br>err | t<br>(ns) | t<br>err | κ̃<br>(k <sub>B</sub> T) ** | κ̃<br>err |
|------------------------------|-------------------------|-------------|----------|----------------|------------------------------------------|-------------------------|-----------|----------|-----------------------------|-----------|
| WT light                     | 0.037                   | 1.59E-4     | 0.46E-4  | 2.1            | 3.11                                     | 0.94                    | 6261.7    | 1793.4   | -                           | -         |
| WT light                     | 0.056                   | 6.10E-4     | 0.48E-4  | 1.9            | 3.54                                     | 0.53                    | 1638.8    | 129.2    | -                           | -         |
| WT light                     | 0.103                   | 8.47E-4     | 0.11E-4  | 1.09           | 0.79                                     | 0.32                    | 1180.6    | 155.1    | -                           | -         |
| WT light at y intercept      | -                       | -           | -        | -              | 0.73                                     | 0.08                    | -         | -        | 12250.10                    | 2707.3    |
| WT-DCMU light                | 0.037                   | 3.08E-4     | 0.19E-4  | 0.26           | 5.99                                     | 0.61                    | 3249.9    | 201.1    | -                           | -         |
| WT-DCMU light                | 0.056                   | 3.98E-4     | 0.25E-4  | 1.11           | 2.31                                     | 0.38                    | 2512.6    | 160.4    | -                           | -         |
| WT-DCMU light                | 0.103                   | 14.3E-4     | 0.99E-4  | 0.57           | 1.31                                     | 0.3                     | 698.8     | 48.2     | -                           | -         |
| WT-DCMU light at y intercept | -                       | -           | -        | -              | 1.00                                     | 0.07                    | -         | -        | 6540.62                     | 967.1     |

**Table S3. Relaxation and bending properties with statistical errors (1σ) of native WT and inhibited WT-DCMU membranes during the light cycle.** The relaxation parameters are calculated according to equation (1) with χ<sup>2</sup> the goodness of Γ fit. The effective bending coefficient is calculated according to equation (3) from the y intercept of the Lorentz fit in Fig. 2a. \*\*The value 0.00125 kg (m s)<sup>-1</sup> is used as the D<sub>2</sub>O viscosity at 20°C in calculation of the bending modulus.
